# Supplementary material
Source: PubMed Central journal article supplement (PMC6814661)
Supplement: 12250_2019_119_MOESM1_ESM.pdf [file 12250_2019_119_MOESM1_ESM.pdf]

## Electronic Supplementary Material

### Prevalence and Molecular Phylogenetic Analysis of Severe Fever with Thrombocytopenia Syndrome Virus in Domestic Animals and Rodents in Hubei Province, China

Jing Cheng<sup>1,3</sup>, Li Zhang<sup>2</sup>, Bing Hu<sup>4</sup>, Qin Wang<sup>5</sup>, Ran Wu<sup>4</sup>, Faxian Zhan<sup>4</sup>, Shuang Rong<sup>1,3</sup>,  
Jianbo Zhan<sup>4</sup>

1. Institute of Nutrition and Chronic Diseases, School of Public Health, Medical College, Wuhan University of Science and Technology, Wuhan 430065, China.
2. Department of Neurology, Hubei Provincial Hospital of Integrated Chinese & Western Medicine, Wuhan 430065, China.
3. Hubei Province Key Laboratory of Occupational Hazard Identification and Control, Wuhan University of Science and Technology, Wuhan 430065, China.
4. Division for Viral Disease Detection, Hubei Provincial Center for Disease Control and Prevention, Wuhan 430079, China
5. National Institute for Viral Disease Control and Prevention, Chinese Center for Disease Control and Prevention, Beijing 102206, China

Supporting information to DOI: 10.1007/s12250-019-00119-y

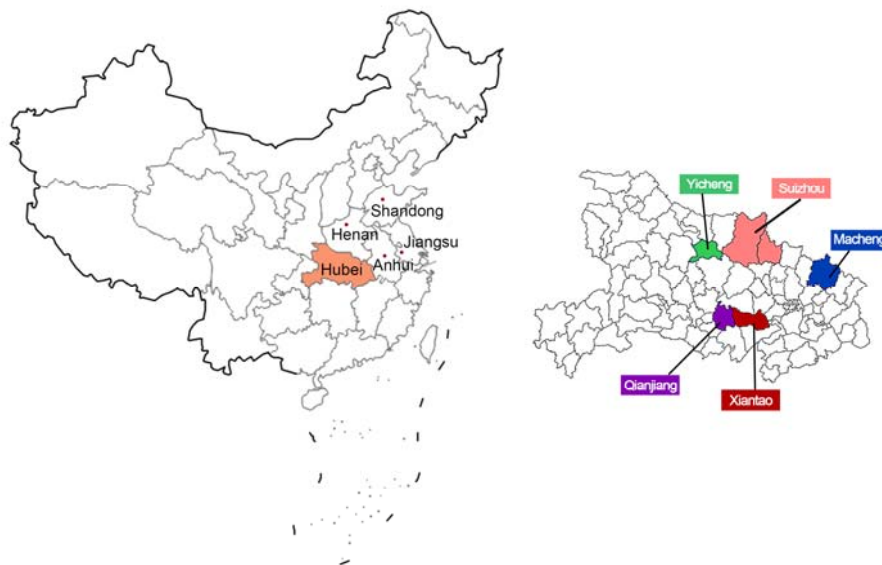

Figure S1. Hubei (Color area), Henan, Anhui, Shandong, and Jiangsu Province, China, where severe fever with thrombocytopenia syndrome was studied. The right image shows the survey locations in Hubei Province, China. Light red and mazarine color, epidemic area; Purple and green and red color, non-epidemic area.

Table S1. The GenBank accession numbers of viral sequence obtained in this study

| SFTSV Strains          | S segment | M segment | L segment | Origin                |
|------------------------|-----------|-----------|-----------|-----------------------|
| HB123/China/2011       | KU664010  | MK355634  | MK355635  | Hubei Province, China |
| HB139/China/2011       | KU664011  | MK355636  | MK355637  | Hubei Province, China |
| HB147/China/2012       | KU664012  | MK355638  | MK355639  | Hubei Province, China |
| HB153/China/2012       | KU664013  | MK355640  | MK355641  | Hubei Province, China |
| HB158/China/2012       | KU664014  | MK355642  | MK355643  | Hubei Province, China |
| HB170/China/2012       | KU664015  | MK355644  | MK355645  | Hubei Province, China |
| HB188/China/2012       | KU664007  | MK355646  | MK355647  | Hubei Province, China |
| HB203/China/2012       | KU664008  | MK355648  | MK355649  | Hubei Province, China |
| HB209/China/2012       | KU664016  | MK355650  | MK355651  | Hubei Province, China |
| HB213/China/2013       | KU664017  | MK355652  | MK355653  | Hubei Province, China |
| HB154/China/2011       | JQ733562  | JQ733560  | JQ733561  | Hubei Province, China |
| HB155/China/2011       | JQ733565  | JQ733563  | JQ733564  | Hubei Province, China |
| HB156/China/2011       | JQ733568  | JQ733566  | JQ733567  | Hubei Province, China |
| HB3-sheep03/China/2011 | KU664009  | MK355654  | MK355655  | Hubei Province, China |
| HB2014-22/China/2014   | KY933675  | KY933688  | KY933701  | Hubei Province, China |
| HB2014-12/China/2014   | KU738907  | KY965128  | KY933696  | Hubei Province, China |
| HB2014-8/China/2014    | KU738905  | KY933682  | KY933696  | Hubei Province, China |
| HB2014-26/China/2014*  | KY933676  | KY933689  | KU529304  | Hubei Province, China |
| HB2014-4/China/2014    | KP984502  | KR080475  | KU524075  | Hubei Province, China |
| HB2014-33/China/2014   | KY933677  | KY933690  | KY933703  | Hubei Province, China |
| HB2014-13/China/2014   | KU738908  | KY933684  | KY933697  | Hubei Province, China |
| HB2014-20/China/2014   | KU738910  | KY933686  | KY933699  | Hubei Province, China |
| HB2014-21/China/2014   | KU738911  | KY933687  | KY933700  | Hubei Province, China |
| HB2014-10/China/2014   | KU738906  | KY933683  | KY933695  | Hubei Province, China |
| HB2014-15/China/2014   | KU738909  | KY933685  | KY933698  | Hubei Province, China |

\*Strain was isolated from Hubei Province.
